# Supplementary material
Source: MDPI journal article supplement (https://www.mdpi.com/1999-4907/13/9/1505)
Supplement: s1 [file s1]

**Table S1. Plant Diversity Index Calculation**

| Plant Diversity Index                         | equation                                                                                                                                                       |
|-----------------------------------------------|----------------------------------------------------------------------------------------------------------------------------------------------------------------|
| 1. Magalef richness index(R)                  | $R = S$                                                                                                                                                        |
| 2. Shannon–Wiener diversity index(H')         | $H' = \sum_{i=1}^S p_i \ln p_i$                                                                                                                                |
| 3. Simpson diversity index(D)                 | $D = 1 - \sum_{i=1}^S p_i^2$                                                                                                                                   |
| 4. Pielou evenness index(E)                   | $E = \frac{H'}{\ln S}$                                                                                                                                         |
| 5. FRic richness index                        | $FRic = \frac{\bigcup_{S \in S_c R_{ts}}}{\bigcup_{S \cup S_c R_{ts}}} = \frac{\int_{S \in S_c}^{max} [I_{st}(x)] dx}{\int_{S \cup S_c}^{max} [I_{st}(x)] dx}$ |
| 6. FEve evenness index                        | $FEve = \frac{\sum_{i=1}^{s-1} \min \left( PEW_i \frac{1}{s-1} \right) - \frac{1}{s-1}}{1 - \frac{1}{s-1}}$                                                    |
| 7. FDiv divergence index                      | $FDiv = \frac{\Delta d + \overline{dG}}{\Delta  d  + \overline{dG}}$                                                                                           |
| 8. RaoQ quadratic entropy index               | $Rao = \sum_{i=1}^s \sum_{j>1}^s d_{ij} w_i w_j$                                                                                                               |
| 9. mean nearest interspecific distance (MNTD) | $MNTD = \sum_m^S \min (d_{mn}) a_m$                                                                                                                            |
| 10. mean interspecific distance index (MPD)   | $MPD = \frac{\sum m \sum n d_{mn} a_m a_n}{\sum m \sum n a_m a_n}$                                                                                             |
| 11. Faith diversity index (PD)                | $PD = B \times \frac{\sum_i^B L_i A_i}{\sum_i^B A_i}$                                                                                                          |

In equations 1-4,  $S$  represents the number of species,  $p_i$  represents the proportion of the  $i$ -th species in the total.

In the equation 5,  $S$  represents the number of species,  $t$  is the trait,  $x$  is the trait value, and  $I_{st}(x)$  is the trait correlation function of  $S$ .  $S_c$  is the community of  $S$ , and  $R_{ts}$  is the range of traits of  $S$ .

In the equation 6,  $S$  represents the number of species,  $i$  is the  $i$ -th species in the community,  $I$  is the branch length and  $PEW_i$  is the branch length weight.

In the equation 7,  $S$  represents the number of species,  $i$  is the  $i$ -th species in the community,  $\overline{dG}$  is the average distance of species  $i$  from the center of gravity, and  $d$  is the weight dispersion of abundance, whose value varies between 0 and 1.

In the equation 8,  $S$  represents the number of species,  $i$  is the  $i$ -th species in the community,  $d_{ij}$  is the Euclidean distance between species  $i$  and species  $j$ , and  $w_i$  is the relative abundance of species  $i$ .

In the equations 9-11,  $n$  refers to the node-based index,  $B$  refers to the number of branches in the tree, and  $L_i$  refers to the length of branch  $i$ .  $A_i$  refers to the average abundance of species sharing branch  $i$ ,  $d_{mn}$  refers to the phylogenetic distance between species  $m$  and species  $n$ , and  $a_m$  is the abundance of species  $m$ .
